# Supplementary material for: A comparative study on the structures of Grifola frondosa polysaccharides obtained by different decolourization methods and their in vitro antioxidant activities
Source: Royal Society of Chemistry journal article supplement (doi:10.1039/c9fo01511f), 2019-01-01
Supplement: c9fo01511f1.pdf [file c9fo01511f1.pdf]

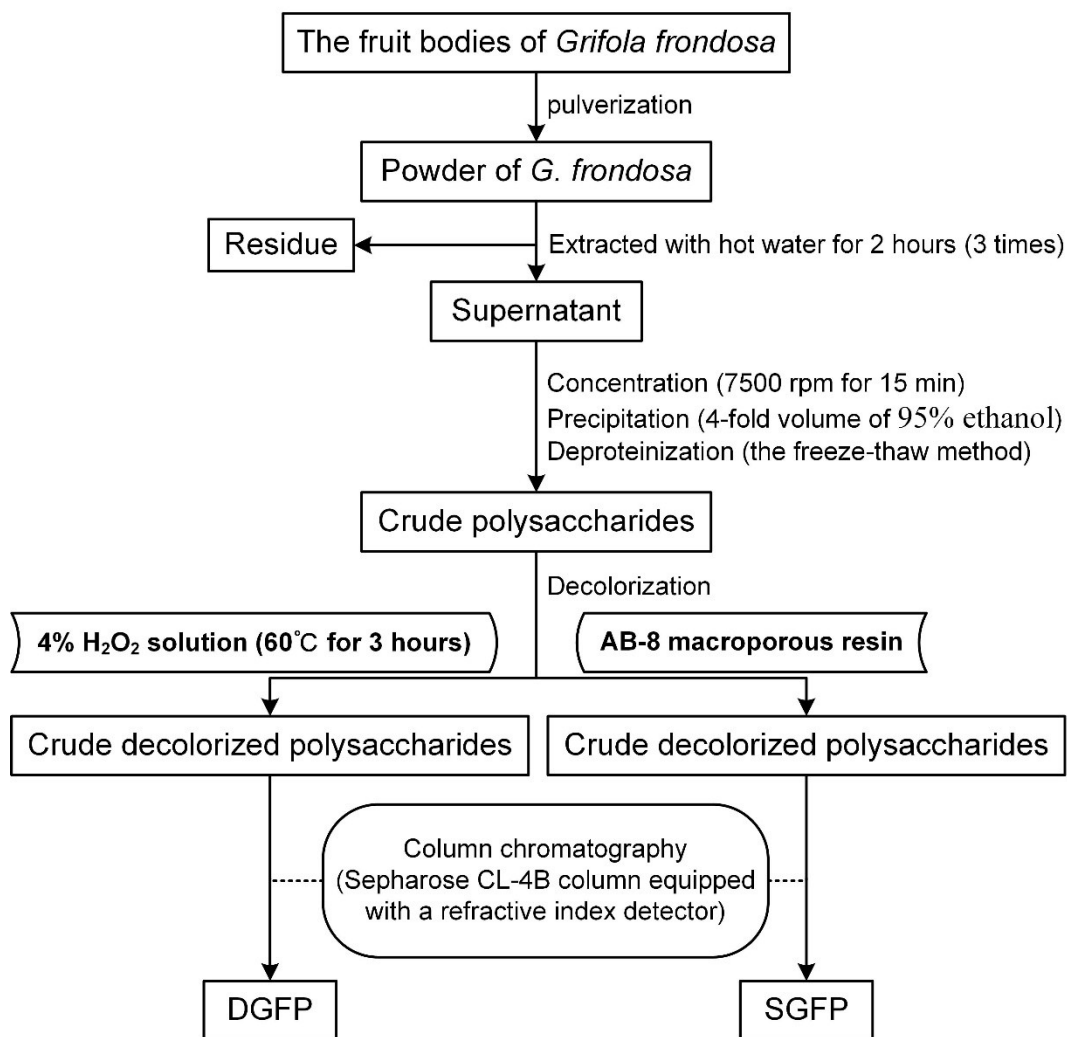

Fig. S1 The extraction processes of polysaccharides from *G. frondosa*

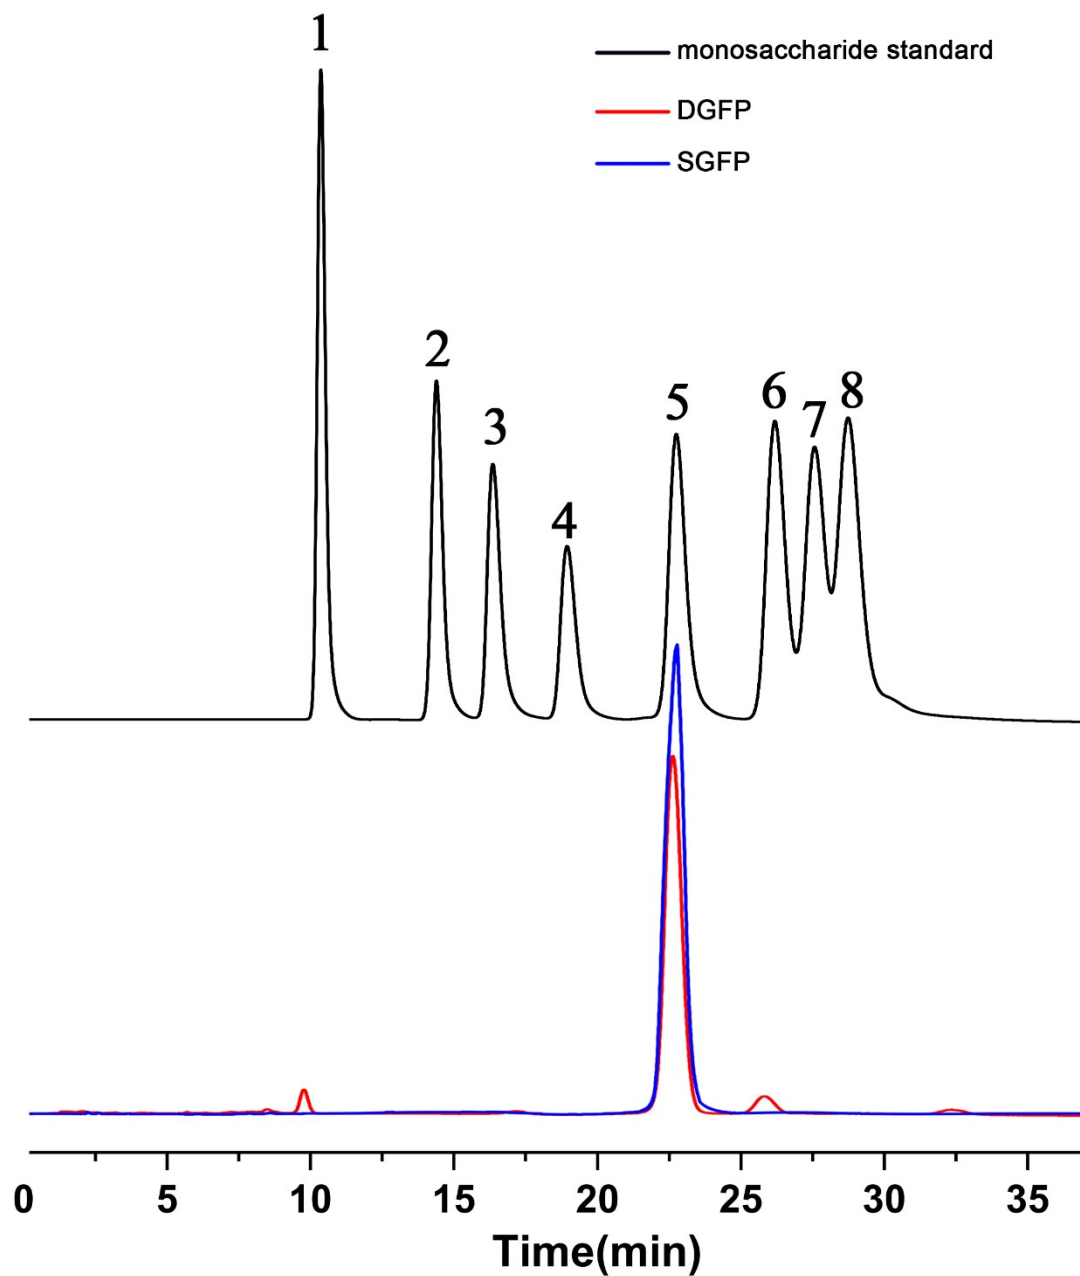

Fig. S2 HPLC chromatogram of mixed monosaccharide standard solution and samples.

Note: peaks 1-8 represent mannose, rhamnose, glucuronic acid, galacturonic acid, glucose, galactose, xylose and arabinose, respectively.

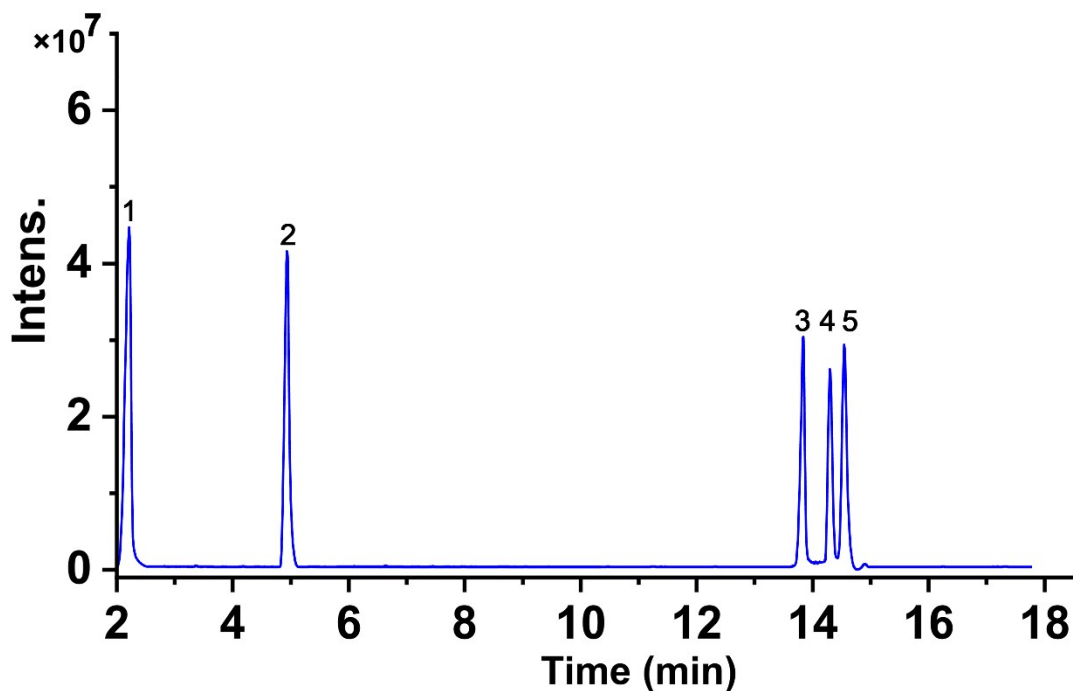

Fig. S3 GC of mixed monosaccharide standards. Note: peaks 1-5 represent glycerol, erythritol, galactose, mannose and glucose, respectively.

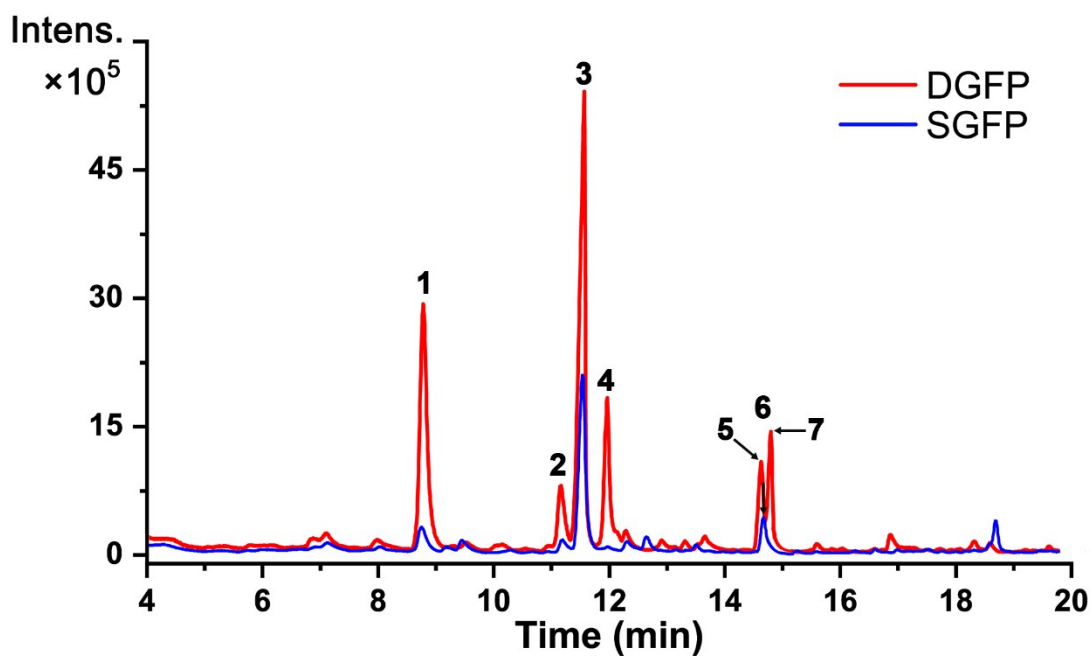

Fig. S4 Total ion gas chromatogram of methylation patterns of DGFP and SGFP. Note: signals 1-7 represent 2,3,4,6-Me<sub>4</sub>-Glc<sub>p</sub>, 2,4,6-Me<sub>3</sub>-Glc<sub>p</sub>, 2,3,6-Me<sub>3</sub>-Glc<sub>p</sub>, 2,3,4-Me<sub>3</sub>-Glc<sub>p</sub>, 2,3-Me<sub>2</sub>-Gal, 2,3-Me<sub>2</sub>-Glc<sub>p</sub>, and 2,4-Me<sub>2</sub>-Man, respectively.

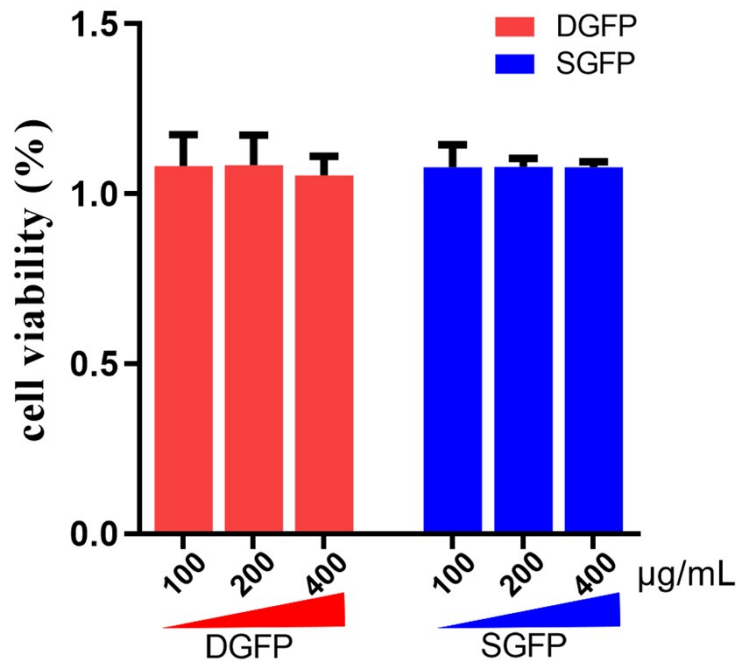

Fig. S5 The effects of DGFP and SGFP on cell viability of HepG2 cells.
